1 A computational neural model for mapping degenerate neural  
2 architectures

3 Zulqarnain Khan<sup>1,\*</sup>, Yiyu Wang<sup>2,\*</sup>, Eli Z. Sennesh<sup>3</sup>, Jennifer Dy<sup>1</sup>, Sarah Ostadabbas<sup>1</sup>,  
4 Jan-Willem van de Meent<sup>3</sup>, J. Benjamin Hutchinson<sup>4,†</sup>, and Ajay B. Satpute<sup>2,†</sup>

5 <sup>1</sup>Department of Electrical & Computer Engineering, College of Engineering, Northeastern  
6 University, Boston, MA 02115, USA

7 <sup>2</sup>Department of Psychology, College of Science, Northeastern University, Boston, MA 02115,  
8 USA

9 <sup>3</sup>Khoury College of Computer Sciences, Northeastern University, Boston, MA 02115, USA

10 <sup>4</sup>Department of Psychology, University of Oregon, Eugene, OR 97403, USA

11 \*Indicates equal contributions.

12 †Indicates shared senior authorship.

13 \*Correspondence to Zulqarnain Khan (khanzu@ece.neu.edu) or Yiyu Wang  
14 (wang.yiyu@northeastern.edu)

15 November 13, 2020

16 **Abstract**

17 Degeneracy in biological systems refers to a many-to-one mapping between physical structures and  
18 their functional (including psychological) outcomes. Despite the ubiquity of the phenomenon, traditional  
19 analytical tools for modeling degeneracy in neuroscience are extremely limited. In this study, we generated  
20 synthetic datasets to describe three situations of degeneracy in fMRI data to demonstrate the limitations  
21 of the current univariate approach. We describe a novel computational approach for the analysis referred  
22 to as neural topographic factor analysis (NTFA). NTFA is designed to capture variations in neural  
23 activity across task conditions and participants. The advantage of this discovery-oriented approach is to  
24 reveal whether and how experimental trials and participants cluster into task conditions and participant  
25 groups. We applied NTFA on simulated data, revealing the appropriate degeneracy assumption in all  
26 three situations and demonstrating NTFA's utility in uncovering degeneracy. Lastly, we discussed the  
27 importance of testing degeneracy in fMRI and the implications of applying NTFA to do so.

28 **Keywords:** Degeneracy, factor analysis, topographic factor analysis, generative model

## 29 1 Introduction

30 Degeneracy refers to the capability of different structures to produce the same effects [1, 2, 3]. For example,  
31 different sets of codons in genetics can produce the same phenotype [4]. Different ion channels - more than are  
32 strictly necessary - are used to tune the firing rate of neurons [5]. Different distributions of neural modulators  
33 and circuit parameters nonetheless produce the same rhythmic activity in a neural circuit [6, 7]. Simple  
34 motor behaviors, like finger tapping, may also be produced by an abundance of distinct motor pathways  
35 [8, 9, 10, 11]. In functional neuroanatomy, degeneracy refers to the notion that the brain may have multiple  
36 solutions or a surplus of neural pathways to produce the same mental state or behavior [12, 13, 14]. Indeed,  
37 computational simulations show that degeneracy is high in networks with high complexity such as the brain  
38 [15, 16], in which multiple distinct, parallel structural pathways may lead from a source node to a destination  
39 node. Such an architecture enables a degree of robustness to changes in the neural environment (e.g. due to  
40 tissue damage) [12, 14].<sup>1</sup>

41 In cognitive neuroscience, degeneracy in functional neuroanatomy suggests there might be systematic  
42 sources of variance across trials or individuals that are of interest for the brain-behavior relationship. For  
43 example, two individuals may use different neural pathways to perform the same task, or one individual  
44 may use different neural pathways in different moments when performing a task. Commonly used analytical  
45 approaches often treat such variation across trials within a condition and across individuals within a sampled  
46 group of participants as error. For example, functional neuroimaging studies that examine task-dependent  
47 changes in functional activation often estimate parameters assuming invariance across trials or participants.  
48 Offering a bit more flexibility, recent machine learning approaches have also been applied to functional  
49 neuroimaging data (e.g. multivoxel pattern analysis)[18, 19], however, these approaches commonly rely  
50 on supervised analytical approaches that imply a common neural activation pattern for trials in the same  
51 task [20]. In both cases, summaries are calculated either across participants, trials, or both in order to  
52 increase signal-to-noise ratios, and residual variance is assumed to provide an estimate of error for calculating  
53 inferential statistics. However, in doing so, these approaches are assuming a non-degenerate functional  
54 architecture *a priori*. As a result, little is known about the extent to which these assumptions prevail vs. the  
55 extent to which there is degeneracy in functional neuroanatomy.

56 Uncovering degeneracy requires analytical tools that are explicitly designed for this purpose. If the brain  
57 provides multiple solutions to complete a given task, then functional activation patterns in a given study may  
58 depend on the participant and moment in time (i.e. by stimulus or trial) in ways that are unbeknownst to  
59 investigators. Thus, it is important to develop an analytical approach that can identify sources of structure  
60 in signal with minimal supervision - that is, without relying on strong *a priori* assumptions of investigators  
61 of how functional activity ought to relate with task performance. Here, we propose a novel computational  
62 model, referred to as Neural Topographic Factor Analysis (NTFA), to examine degeneracy in functional  
63 neuroanatomy. Our model is built off of earlier topographic factor analysis approaches [21] and takes as  
64 input individuated segments of 4D fMRI timeseries data with labels for participant and trial. It does not  
65 require knowledge about the attributes of participants (demographic, personality, genetic, etc.), nor does it  
66 require knowledge about how trials sort into conditions. NTFA learns a low-dimensional representation - or  
67 an embedding - of functional activity for each participant and trial on the basis of shared patterns of neural  
68 activation from segments of data. The embeddings provide a simple, readily visualizable depiction of whether  
69 and how neural responses during a task vary across participants, trials, and participant by trial combinations.

70 In this paper, our goal is to validate NTFA using a simulation approach. Computational simulations  
71 are critical to test whether novel computational models are capable of performing as expected in principle,  
72 that is, under conditions with a known ground truth. In practice, the data generating mechanisms for  
73 functional neuroanatomy are rarely, if ever, known. That is why it is of particular importance in cognitive  
74 neuroscience to develop modeling approaches that are capable of providing insight as to whether there is  
75 likely to be degeneracy in functional neuroanatomy from the data alone and with minimal supervision. Using  
76 computational simulations, we first demonstrate the considerable shortcomings of applying the most commonly  
77 used "univariate" activation-based analytical approach in fMRI data analysis when there is degeneracy. In  
78 the typical form of this analysis, a general linear model is used to determine whether functional activity in a

---

<sup>1</sup>The concept of degeneracy may overlap with redundancy because they both suggest there are multiple solutions that can produce the same output, however they differ in the flexibility for the system to choose which solution to produce the outcome. See discussion in [1, 13, 17, 14].

79 given voxel or brain region (i.e. set of voxels) is greater during trials from one experimental condition relative  
80 to a baseline condition. We then implement NTFA on simulated datasets with minimal assumptions about  
81 whether trials ought to be nested into particular task conditions, or participants into particular groups. Our  
82 deliverable is a demonstration of the ability of NTFA to recover embeddings that reveal degeneracy, and  
83 non-degeneracy, in simulated 4D timeseries data with topological structure (e.g. as in fMRI data).

## 84 2 Methods

85 Before discussing the model design in NTFA we begin by considering the consequences of applying widely  
86 used univariate analyses [22] to synthetic data that exhibit degeneracy. This approach serves two purposes.  
87 First, using synthetic data illustrates the pitfalls of using traditional univariate analyses in terms of capturing  
88 degeneracy. Second, this synthetic data provides a known ground truth to validate NTFA's performance.  
89 Rather than extensively review the various forms of degeneracy that can occur in the brain, we decided  
90 to demonstrate two aspects of degeneracy that could occur in fMRI data. We generated the synthetic  
91 datasets to reflect a generic experimental framework in which participants undergo a baseline condition and  
92 an experimental condition. For example, in a study on fear, the baseline condition may consist of multiple  
93 trials that maintain a neutral affective state, and multiple trials that induce fear. In a study on working  
94 memory, there may be trials that involve low capacity demand in the baseline condition, and trials that involve  
95 high capacity demand in the experimental condition. We used the term, trial, to broadly represent trials in  
96 sequence (e.g. the first, second, ..., trial of the task), or the specific contents of a trial in a task (e.g. trials  
97 that present stimulus A, stimulus B, ..., in which each stimulus is a sampled instance from the same task).  
98 Degeneracy may occur in either case. For simplicity, each synthetic dataset consisted of two participants,  
99 and we assumed a single baseline state. We simulated multivariate patterns of neural activity throughout  
100 the brain by sampling from a prespecified underlying distribution. We then modeled three hypothetical  
101 situations to reflect different assumptions of degeneracy, which are described in more detail in the subsequent  
102 section (Figure 1). To demonstrate that standard neuroimaging analysis is limited in capturing degeneracy, we  
103 applied a standard univariate General Linear Model (GLM) to calculate a contrast between the experimental  
104 conditions and the baseline condition.

### 105 2.1 Non-degeneracy

106 The non-degenerate functional neuroarchitecture stipulates that experimental trials evoking a common  
107 psychological state or process share a common underlying pattern of activation. We generated simulated  
108 data to fit this assumption. We started by selecting three brain areas randomly to create a pattern of  
109 activation during experimental condition trials (Figure 1A). We chose three areas arbitrarily to reflect the  
110 fact that the assumptions of a non-degenerate functional neuroanatomy have little to do whether the pattern  
111 of activation is localized to one area or distributed across many areas. What is important is that the same  
112 pattern of activation is assumed to occur consistently across trials and participants, and that a non-degenerate  
113 model treats variation as residual error. To capture this assumption in our synthetic data, we specified the  
114 data generating process as a unimodal distribution. This refers to one pattern of neural activity with some  
115 Gaussian distributed noise across trials and participants. The synthetic data from individual trials A, B, and  
116 C, as shown in (Figure 1A), were sampled from this distribution. This model suggests there is a common  
117 pattern of activation across all trials that evoke fear, for example.

118 We then evaluate how a standard univariate analysis using a GLM performs on this data. The GLM  
119 resembles a supervised analytical approach insofar as experimenters must specify beforehand the regressors  
120 in the model. In so doing, experimenters must make assumptions about how trials are nested into conditions.  
121 In our example experiment, Trials A, B, and C, would all be modeled with a single regressor since they  
122 belong to the same experimental condition. In that sense, the GLM shares the same assumptions as the data  
123 generating process. As shown in Figure 1D (top), applying the GLM to our synthetic data shows that it  
124 perfectly suits the non-degenerate functional neuroanatomy.

## 125 2.2 Degeneracy by Condition

126 Degeneracy by condition refers to the existence of multiple distinct patterns of neural activation that occur  
127 across trials of the same experimental condition. Using fear as our running example, different fear induction  
128 trials may involve different patterns of brain activation (Figure 1B). To simulate data corresponding to a  
129 degeneracy by condition model, our data generating process involved sampling from one of three different  
130 distributions. Each of the three distributions gave rise to distinct activation patterns from the others, while  
131 maintaining similar activation patterns within the distribution. In Figure 1B, Trials A, B, and C are exemplars,  
132 with each one sampled from a different distribution. Thus, degeneracy by condition suggests that multiple  
133 distinct activation patterns may occur during trials within the same experimental condition. There could  
134 be many reasons for degeneracy, as noted in the introduction and as we speculate upon in the discussion.  
135 However, the purpose of the synthetic dataset is to illustrate how well certain models would perform when  
136 the assumption of degeneracy by condition holds.

137 A standard univariate analysis does not perform well in this situation. Without knowledge of the actual  
138 data generating process, experimenters would again model the data using a single regressor for Trials A, B, and  
139 C – even though the underlying distributions are heterogeneous. In other words, the standard GLM requires  
140 the experimenter to make assumptions about how trials are organized into experimental conditions, with one of  
141 those assumptions being the absence of degeneracy. As a result, the GLM precludes the ability to test whether  
142 there is, or is not, a degenerate relationship. To illustrate the consequences, we fit a GLM to our simulated  
143 data. As shown in Figure 1D (middle), the univariate activation map appears as an amalgam of the three  
144 data generating distributions. Even when the ground truth (i.e. the underlying generative process) exhibits  
145 degeneracy by condition, a standard univariate analysis may still produce seemingly “reliable” findings (i.e.  
146 significant and reproducible findings with enough participants). However, the resulting pattern of activation  
147 in Figure 1D (middle) would not accurately capture the actual data generating process. Consequently, it  
148 could lead to a mistaken, but statistically “reliable”, conclusion about the relationship between neural activity  
149 and the experimental condition.

## 150 2.3 Degeneracy by Participant and Condition

151 For our third situation, we examined degeneracy with respect to both condition and participant. Similar to  
152 the example in the degeneracy by condition scenario, a participant would have different patterns of activation  
153 during different trials of the same experimental condition. In addition, however, the participant would also  
154 have a different pattern of neural activation than other participants, even during the same trial. For example,  
155 both participants may report experiencing the same level of fear when shown the same fear-inducing stimulus,  
156 but nevertheless show differential activation patterns.

157 This situation is illustrated in Figure 1C. Two participants may be presented with the same set of trial  
158 stimuli and even have the same behavioral responses, but the underlying neural patterns may nonetheless  
159 vary. For example, in Trial A, the exemplar data from two participants share activity in dorsal areas, but  
160 one participant also shows activity in ventral areas. In Trial B, they show similar patterns of activation. In  
161 contrast, in Trial C, there are again differences between participants. Thus, our data generating procedure  
162 was designed to capture: (i) degeneracy across participants by including both participant-specific activation  
163 patterns (e.g. Trials A and C), (ii) degeneracy by condition by including variation in activation patterns across  
164 Trials A-C within a participant, and also (iii) activation patterns that are also shared across participants (e.g.  
165 Trial B). We purposefully designed the synthetic data in this way to test the utility of NTFA in addressing  
166 this complexity.

167 Critically, degeneracy with respect to participants highlights another important assumption of standard  
168 univariate analyses. The analytical procedure of a GLM involves stages such that the outputs of the trial- and  
169 subject-level analyses are inputs to the group-level analyses. This sequence of analyses assumes a nested data  
170 structure in which trials of an experimental condition within one participant’s data and each participant from  
171 their group are from one normal distribution. This assumption is valid under a non-degeneracy functional  
172 neuroanatomy (shown in Figure 1A), but could preclude the ability to examine degeneracy in the functional  
173 neuroanatomy. Instead of applying the same first level model to all participants, a more appropriate model  
174 would fit the run and participant level simultaneously without assuming this nested structure.

175 Ultimately, the standard univariate approach are insensitive to variations across trials, compounded by  
176 degeneracy across individuals. It treats the systematic variation in activation patterns across trials and

177 participants as error. Though it may produce reliable findings with sufficient power, it would result in a  
178 diffuse pattern of activation that is not representative of the data generating process. This is shown in  
179 Figure 1D (bottom) as applied to our synthetic data.

### 180 3 Neural Topographic Factor Analysis (NTFA)

181 In light of the shortcomings of the standard univariate analysis discussed in the previous section, there is  
182 a need for models that can uncover degeneracy when it is present in the data. We propose NTFA [23] for  
183 this purpose. NTFA is a generative model<sup>2</sup> built off of earlier topographic factor approaches for fMRI data  
184 [21] that is designed to learn low-dimensional, visualizable embeddings from segments of data for different  
185 participant-task combinations. The spatial positions of these embeddings can reveal different aspects of the  
186 data, including degeneracy. Moreover, NTFA is primarily unsupervised, requiring only the participant and  
187 trial identities<sup>3</sup>. We provide an overview of NTFA’s generative model and training mechanism in Figures 2  
188 and 3 respectively. A comprehensive explanation of these can be found in the supplement 5.

189 NTFA is designed to enable systematic comparison of functional neuroanatomy across individuals and  
190 task conditions by mapping fMRI data to low-dimensional (and visualizable) embeddings. We achieve this  
191 goal by formalizing three assumptions:

- 192 • First, we assume voxel-level data can be parsimoniously expressed as a much smaller set of functional  
193 units, which we refer to as **spatial factors**. We model these spatial factors as radial basis functions,  
194 and the activation at a given voxel as a sum of weighted contributions from these factors.
  
- 195 • Second, we assume that the same spatial factors exist in all participants, but their precise spatial location  
196 may vary across individuals. A set of low dimensional participant dependent **spatial embeddings**  
197 ( $z^{\text{PF}}$ ) capture this variation. A neural network maps these embeddings to the centers (location) and  
198 widths (extent) of the spatial factors. This neural network is shared across participants. The neural  
199 network allows us to learn a possibly nonlinear mapping from the space of spatial embeddings to that of  
200 spatial factors. This is important, as the anatomical alignment literature [24, 25] makes it implausible  
201 that this relationship can be captured with a linear transformation. Similarly, sharing a single neural  
202 network among all factors and all participants allows the spatial embeddings to be commensurable  
203 between participants. A Gaussian prior on the spatial embeddings encourages them to be close to each  
204 other.
  
- 205 • Third, we assume that degeneracy or non-degeneracy is effectively revealed as a combination of how a  
206 single participant’s brain responds to the various trials in a task condition (i.e. participant dependent  
207 activity) and how multiple individuals might respond to a the same trial in a task condition (i.e.  
208 trial dependent activity). By combining estimates of these sources of variation, we are able to detect  
209 whether neural activity in response to the same trial varies systematically across individuals, which  
210 we refer to as participant task combinations. Similar to the approach used for the spatial embeddings,  
211 participant dependent ( $p$ ) and trial dependent ( $s$ ) activity is estimated across the spatial factors  
212 (through embeddings  $z^{\text{PW}}$  and  $z^{\text{S}}$  respectively) and combined through a neural network to generate  
213 ( $\mathbf{p} \times \mathbf{s}$ )**activation embeddings** ( $z^{\text{C}}$ ). The use of shared neural networks here once again ensures  
214 that the low dimensional embeddings can capture non-linear effects and make these embeddings  
215 commensurable between different participant-task combinations.

216 Taken together, these spatial and activation embeddings respectively provide a low-dimensional summary  
217 of where and how individuals’ brains respond to an experiment. Critically, the activation embeddings  
218 also summarize whether such responses are shared or diverge across individuals, hereby revealing potential  
219 degeneracy. For the simulated data from the three models discussed above, we can expect these activation  
220 embeddings to arrange in the following clearly different ways:

---

<sup>2</sup>A generative model here refers to a probabilistic model that characterizes a probability distribution from which new data could be generated in order to resemble the observed data

<sup>3</sup>NTFA is flexible in the sense that users can incorporate supervision by specifying *a priori* groups of participants or trials. This can be done by providing the same identity to participants (or trials) belonging to the same group



- 221 • **Non-degenerate:** For the non-degenerate scenario discussed in Section 2.1, we would expect the  
222 participant-trial activation embeddings to broadly fall in just two clusters: one for baseline and the  
223 other for the experimental condition. Figure 4(A) shows that the embeddings learned from NTFA  
224 indeed fall into two clusters.
- 225 • **Degeneracy by condition:** In the scenario discussed in Section 2.2, the activation embeddings are  
226 expected to fall in four distinct clusters: one for the baseline, and one each for the three underlying  
227 degeneracy modes. These will correspond to the differences in the three trials. Figure 4(B) shows that  
228 is indeed the case for the learned embeddings on this data.
- 229 • **Degeneracy by condition and participant:** In the scenario discussed in Section 2.3, the activation  
230 embeddings can be expected not only to group by trial, but also to split up by participants, with trials  
231 A and C revealing the degeneracy by condition and participants. Figure 4(C) shows precisely this  
232 expected behaviour.

## 233 4 Discussion

234 Recent work in computational biology and functional neuroanatomy suggests that the brain may have multiple  
235 solutions, or degenerate neural pathways, when trying to solve a given task. However, current analytical  
236 methods are not optimized to capture such degeneracy. Here, we advanced a novel computational approach,  
237 NTFA, to address this issue. NTFA is a generative model that learns a low-dimensional space of embeddings  
238 from the temporal and spatial variation of fMRI data. The embeddings yield a visualizable representation of  
239 the latent variations in functional activity across trials and participants. The distribution of these embeddings  
240 can provide useful information for researchers to assess whether the data generating mechanism is degenerate  
241 or non-degenerate with respect to trial conditions and participants.

242 Related to NTFA, there are other models that also use latent factorization methods to analyze fMRI  
243 data, however, they are not currently equipped for modeling degeneracy with respect to task conditions and  
244 participants. These include topographic latent factorization models, such as topographic factor analysis and  
245 hierarchical topographic factor analysis [26, 21, 27], and non-topographic models such as principal component  
246 analysis [28], independent component analysis [29], the shared response model [30], hyper alignment [24], and  
247 dictionary learning methods [31]. These approaches are designed to address variation in functional alignment  
248 (e.g. individual differences in precise locations of the so-called fusiform face area [32, 25]). However, none of  
249 these methods explicitly model variation in functional activity across *both* participants and task conditions.  
250 Of note, NTFA is flexible in its implementation. If researchers preferred to label their trials as belonging  
251 to specific task conditions, or participants as belonging to specific groups, NTFA can accommodate these  
252 assumptions and develop a generative model with these assumptions built in (e.g. for more direct comparison  
253 with other approaches). NTFA's other features may also be useful to the community. For example, NTFA  
254 explicitly models variation in the locations, sizes, and magnitudes of activation, whereas the vast majority of  
255 studies using univariate analysis of fMRI data focus only on activation magnitudes.

256 NTFA is, of course, not without some limitations, one of which is determining whether learned embeddings  
257 are modeling functionally meaningful signal or simply noise. Although much variation in fMRI data across  
258 time/trials (and across participants) is noise and should be discarded, that does not mean that all (or even  
259 most) variation unaccounted for by standard modeling approaches is necessarily noise. Here, we suggest  
260 that there is good reason to think that such variation might be structured and functionally meaningful (as  
261 described next), that historical approaches are insensitive to such variation unless it aligns with a narrow  
262 range of a priori hypotheses, and that NTFA is a technique that is designed to sift potentially interpretable,  
263 structured variation from random noise.

264 While our primary aim is constrained to establishing and validating our model using simulations, high-  
265 lighting some relevant research findings may point to useful future directions in which to develop applications  
266 for NTFA. In general, it is well-known that psychological tasks are not "process pure" [33, 34]. A given task  
267 may involve a variety of different cognitive processes, neural pathways and/or strategies, which may shift  
268 and change over time and trials. Indeed, carefully constructed experiments have found results consistent  
269 with degeneracy even when using more traditional analytical tools. For example, dissociable neurocognitive  
270 memory systems can be used to complete the same overt memory task [35, 36, 37, 38]. When one system is

271 compromised due to brain damage, other systems may be utilized to nonetheless complete the task at hand  
272 [39, 40, 12]. An increasing number of findings suggest that the brain is likely to offer multiple solutions in  
273 other domains too, such as in social cognition [41, 42] and emotion [43, 20]. NTFA may also be of particular  
274 relevance for translational research. Emerging work suggests that distinct neuropathologies may underlie  
275 a common clinical phenotype [44]. For example, research on depression suggests that there may be many  
276 different neuropathologies that give rise to depressive symptoms [45, 46, 47, 48]. Indeed, the call for "precision  
277 medicine" reflects a general failure of more traditional, non-degenerate theoretical models and rigid analytical  
278 approaches to account for heterogeneity in the underlying neural causes of mental health. A systematic  
279 evaluation of this variance is a critical step towards enabling precision medicine approaches in fMRI, in which  
280 neuroimaging studies have the potential to significantly advance diagnosis and treatment [49].

281 Despite these notable empirical examples, more often than not researchers assume that a given task involves  
282 a core set of processes that are shared across trials and participants. This may be because more traditional  
283 theoretical models in cognitive neuroscience rarely postulate degeneracy in functional neuroanatomy. However,  
284 more recent, predictive processing models of the brain suggest that degeneracy is likely to be common in  
285 mind-brain mapping [14, 50]. Another reason that researchers tend to assume a non-degenerate functional  
286 neuroanatomy is because it has been analytically challenging to not make this assumption. By addressing  
287 this analytical gap, NTFA offers new opportunities to model structured variance in fMRI data with a degree  
288 of independence from our own preconceived ideas of how this variance ought to be structured, and the  
289 opportunity to discover and model degeneracy in functional neuroanatomy.

## 290 References

- 291 [1] Edelman, G. M. & Gally, J. A. Degeneracy and complexity in biological systems. *Proceedings of the*  
292 *National Academy of Sciences* **98**, 13763–13768 (2001).
- 293 [2] Tononi, G., Sporns, O. & Edelman, G. M. Measures of degeneracy and redundancy in biological networks.  
294 *Proceedings of the National Academy of Sciences* **96**, 3257–3262 (1999).
- 295 [3] Whitacre, J. M. Degeneracy: a link between evolvability, robustness and complexity in biological systems.  
296 *Theoretical Biology and Medical Modelling* **7**, 6 (2010).
- 297 [4] Konopka, A. K. Theory of degenerate coding and informational parameters of protein coding genes.  
298 *Biochimie* **67**, 455–468 (1985).
- 299 [5] Drion, G., O’Leary, T. & Marder, E. Ion channel degeneracy enables robust and tunable neuronal firing  
300 rates. *Proceedings of the National Academy of Sciences* **112**, E5361–E5370 (2015).
- 301 [6] Gutierrez, G. J., O’Leary, T. & Marder, E. Multiple mechanisms switch an electrically coupled,  
302 synaptically inhibited neuron between competing rhythmic oscillators. *Neuron* **77**, 845–858 (2013).
- 303 [7] Gutierrez, G. J. & Marder, E. Modulation of a single neuron has state-dependent actions on circuit  
304 dynamics. *Eneuro* **1** (2014).
- 305 [8] Bernstein’s, N. The co-ordination and regulation of movements (1967).
- 306 [9] Wolpert, L. Causal belief and the origins of technology. *Philosophical transactions. Series A, Mathematical,*  
307 *physical, and engineering sciences* **361**, 1709–19, DOI: [10.1098/rsta.2003.1231](https://doi.org/10.1098/rsta.2003.1231) (2003).
- 308 [10] Seifert, L., Komar, J., Araújo, D. & Davids, K. Neurobiological degeneracy: A key property for functional  
309 adaptations of perception and action to constraints. *Neuroscience & Biobehavioral Reviews* **69**, 159–165  
310 (2016).
- 311 [11] Latash, M. L. Movements that are both variable and optimal. *Journal of human kinetics* **34**, 5–13  
312 (2012).
- 313 [12] Price, C. J. & Friston, K. J. Degeneracy and cognitive anatomy. *Trends in cognitive sciences* **6**, 416–421  
314 (2002).
- 315 [13] Friston, K. J. & Price, C. J. Degeneracy and redundancy in cognitive anatomy. *Trends in cognitive*  
316 *sciences* **4**, 151–152 (2003).
- 317 [14] Sajid, N., Parr, T., Hope, T. M., Price, C. J. & Friston, K. J. Degeneracy and redundancy in active  
318 inference. *Cerebral Cortex* (2020).
- 319 [15] Tononi, G., Sporns, O. & Edelman, G. M. A measure for brain complexity: relating functional segregation  
320 and integration in the nervous system. *Proceedings of the National Academy of Sciences* **91**, 5033–5037  
321 (1994).
- 322 [16] Tononi, G., Sporns, O. & Edelman, G. M. A complexity measure for selective matching of signals by the  
323 brain. *Proceedings of the National Academy of Sciences* **93**, 3422–3427 (1996).
- 324 [17] Marder, E. & Taylor, A. L. Multiple models to capture the variability in biological neurons and networks.  
325 *Nature neuroscience* **14**, 133–138 (2011).
- 326 [18] Kriegeskorte, N., Goebel, R. & Bandettini, P. Information-based functional brain mapping. *Proceedings*  
327 *of the National Academy of Sciences* **103**, 3863–3868 (2006).
- 328 [19] Haxby, J. V. Multivariate pattern analysis of fmri: the early beginnings. *Neuroimage* **62**, 852–855  
329 (2012).



- 330 [20] Azari, B. *et al.* Comparing supervised and unsupervised approaches to emotion categorization in the  
331 human brain, body, and subjective experience. (2020).
- 332 [21] Manning, J., Ranganath, R., Norman, K. & Blei, D. Topographic factor analysis: A bayesian model for  
333 inferring brain networks from neural. (2014).
- 334 [22] Monti, M. M. Statistical analysis of fmri time-series: a critical review of the glm approach. *Frontiers in*  
335 *human neuroscience* **5**, 28 (2011).
- 336 [23] Sennesh, E. *et al.* Neural topographic factor analysis for fmri data. *ArXiv* **abs/1906.08901** (2019).
- 337 [24] Haxby, J. V. *et al.* A common, high-dimensional model of the representational space in human ventral  
338 temporal cortex. *Neuron* **72**, 404–416 (2011).
- 339 [25] Saxe, R., Brett, M. & Kanwisher, N. Divide and conquer: a defense of functional localizers. *Neuroimage*  
340 **30**, 1088–1096 (2006).
- 341 [26] Manning, J. R. *et al.* Hierarchical topographic factor analysis. In *Pattern Recognition in Neuroimaging,*  
342 *2014 International Workshop On*, 1–4 (IEEE, 2014).
- 343 [27] Gershman, S. J., Blei, D. M., Pereira, F. & Norman, K. A. A topographic latent source model for fmri  
344 data. *NeuroImage* **57**, 89–100 (2011).
- 345 [28] Pearson, K. Liii. on lines and planes of closest fit to systems of points in space. *The London, Edinburgh,*  
346 *and Dublin Philosophical Magazine and Journal of Science* **2**, 559–572 (1901).
- 347 [29] Hyvärinen, A. Survey on independent component analysis. (1999).
- 348 [30] Chen, P.-H. C. *et al.* A reduced-dimension fmri shared response model. In *Advances in Neural Information*  
349 *Processing Systems*, 460–468 (2015).
- 350 [31] Mensch, A., Mairal, J., Bzdok, D., Thirion, B. & Varoquaux, G. Learning neural representations of  
351 human cognition across many fmri studies. In *Advances in neural information processing systems*,  
352 5883–5893 (2017).
- 353 [32] Saxe, R. & Kanwisher, N. People thinking about thinking people: the role of the temporo-parietal  
354 junction in “theory of mind”. *Neuroimage* **19**, 1835–1842 (2003).
- 355 [33] Jacoby, L. L. A process dissociation framework: Separating automatic from intentional uses of memory.  
356 *Journal of memory and language* **30**, 513–541 (1991).
- 357 [34] Surprenant, A. M. & Neath, I. *Principles of memory* (Psychology Press, 2013).
- 358 [35] K Morgan, K., Zeithamova, D., Luu, P. & Tucker, D. Spatiotemporal dynamics of multiple memory  
359 systems during category learning. *Brain Sciences* **10**, 224 (2020).
- 360 [36] Zeithamova, D. & Maddox, W. T. Dual-task interference in perceptual category learning. *Memory &*  
361 *cognition* **34**, 387–398 (2006).
- 362 [37] Knowlton, B. J. & Squire, L. R. The learning of categories: Parallel brain systems for item memory and  
363 category knowledge. *Science* **262**, 1747–1749 (1993).
- 364 [38] Casale, M. B. & Ashby, F. G. A role for the perceptual representation memory system in category  
365 learning. *Perception & Psychophysics* **70**, 983–999 (2008).
- 366 [39] Poldrack, R. A. & Packard, M. G. Competition among multiple memory systems: converging evidence  
367 from animal and human brain studies. *Neuropsychologia* **41**, 245–251 (2003).
- 368 [40] White, N. M. & McDonald, R. J. Multiple parallel memory systems in the brain of the rat. *Neurobiology*  
369 *of learning and memory* **77**, 125–184 (2002).

- 370 [41] Lieberman, M. D., Jarcho, J. M. & Satpute, A. B. Evidence-based and intuition-based self-knowledge:  
371 an fmri study. *Journal of personality and social psychology* **87**, 421 (2004).
- 372 [42] Amodio, D. M. Social cognition 2.0: An interactive memory systems account. *Trends in Cognitive*  
373 *Sciences* **23**, 21–33 (2019).
- 374 [43] Satpute, A. B. & Lindquist, K. A. The default mode network’s role in discrete emotion. *Trends in*  
375 *cognitive sciences* **23**, 851–864 (2019).
- 376 [44] Fried, E. Moving forward: how depression heterogeneity hinders progress in treatment and research  
377 (2017).
- 378 [45] Beijers, L., Wardenaar, K. J., van Loo, H. M. & Schoevers, R. A. Data-driven biological subtypes of  
379 depression: systematic review of biological approaches to depression subtyping. *Molecular psychiatry* **24**,  
380 888–900 (2019).
- 381 [46] Müller, V. I. *et al.* Altered brain activity in unipolar depression revisited: meta-analyses of neuroimaging  
382 studies. *JAMA psychiatry* **74**, 47–55 (2017).
- 383 [47] Price, R. B., Gates, K., Kraynak, T. E., Thase, M. E. & Siegle, G. J. Data-driven subgroups in depression  
384 derived from directed functional connectivity paths at rest. *Neuropsychopharmacology* **42**, 2623–2632  
385 (2017).
- 386 [48] Price, R. B. *et al.* Parsing heterogeneity in the brain connectivity of depressed and healthy adults during  
387 positive mood. *Biological psychiatry* **81**, 347–357 (2017).
- 388 [49] Fonseka, T. M., MacQueen, G. M. & Kennedy, S. H. Neuroimaging biomarkers as predictors of treatment  
389 outcome in major depressive disorder. *Journal of affective disorders* **233**, 21–35 (2018).
- 390 [50] Hutchinson, J. B. & Barrett, L. F. The power of predictions: An emerging paradigm for psychological  
391 research. *Current directions in psychological science* **28**, 280–291 (2019).
- 392 [51] Narayanaswamy, S. *et al.* Learning disentangled representations with semi-supervised deep generative  
393 models. In *Advances in Neural Information Processing Systems*, 5925–5935 (2017).

## 394 Acknowledgements

395 Research reported in this publication was supported by Department of Graduate Education (NCS 1835309)  
396 and the Brain and Cognitive Sciences Division (1947972) of the National Science Foundation.

## 397 Author contributions statement

398 Z.K., Y.W., A.S. and J.B.H. designed the study. Z.K. and Y.W. performed the analysis and drafted  
399 the manuscript with guidance from A.S. and J.B.H. All authors reviewed and provided feedback on the  
400 manuscript.

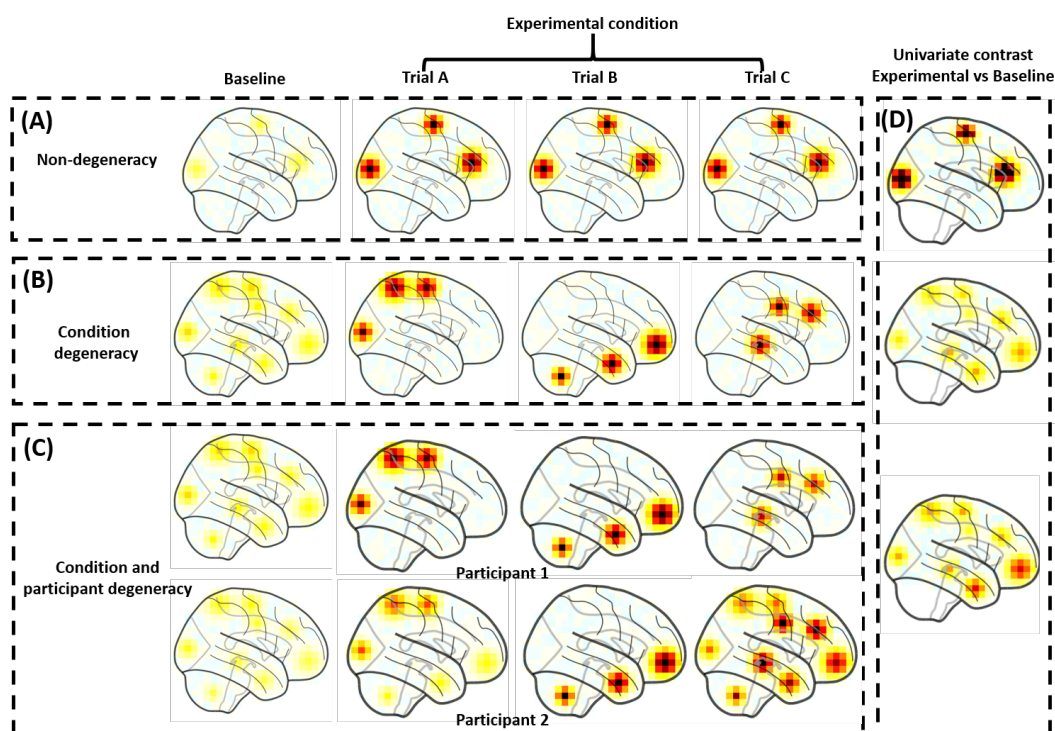

Figure 1: **Standard univariate analysis applied to degenerate situations.** We applied univariate analysis (right panel) to three simulated datasets (left panels), assuming a simple experimental design with a baseline condition and a task condition involving multiple trials. In an affective neuroscience task, for example, the experimental condition might be a fear condition, as designated and labeled by the experimenter, which consists of multiple trials that are thought to induce fear. **(A)** Non-degeneracy: We simulated data from a situation without degeneracy, in which a consistent set of regions are more active during the experimental condition than the baseline condition across trials (and across participants). **(B)** Condition degeneracy: Simulated data included different patterns of activation associated with different trials of the same experimental condition. **(C)** Degeneracy by condition and participant: Simulated data included different patterns of activation are associated with different trials and participants. **(D)** A traditional univariate analysis performs well in the situation without degeneracy. However, the analysis would be insensitive to the variations in the two situations involving degeneracy. Critically, with sufficient statistical power, the univariate analysis may still yield significant activations in situations B and C. However, the summary map would grossly mischaracterize the data, and the underlying data generating distribution.

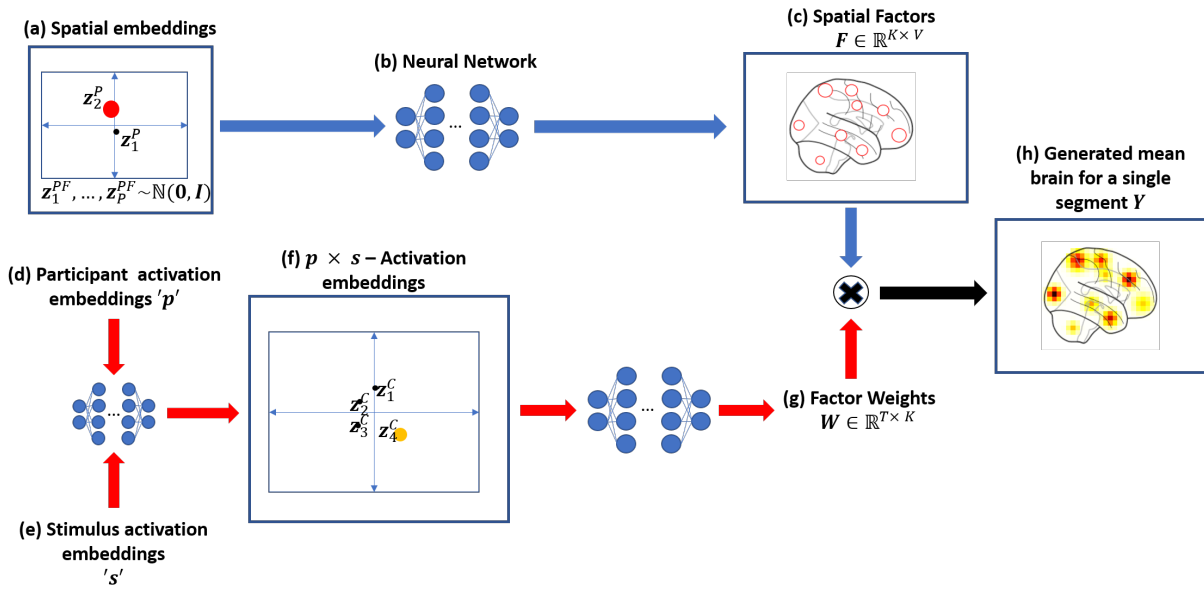

Figure 2: **NTFA Generative Model:** This figure describes how NTFA generates a single segment of fMRI data with  $V$  voxels and  $T$  TRs. NTFA treats a single participant-trial combination in the experiment as a segment of fMRI data such that it could model the participant and trial dependent activation without grouping participants or trials a priori. Concisely, NTFA splits this data generation into two parts, reflected by the two pathways in this figure. The first pathway, following the blue arrows, generates a participant dependent set of spatial factors. The second pathway, following the red arrows, generates the participant *and* trial dependent activation weights for these factors. The multiplication of these spatial factors and the factor weights gives us the generated fMRI segment. **(a-c) Generating spatial factors:**(a) We sample 2-dimensional spatial embeddings ( $z^{PF}$ ) from a gaussian prior, with each dot representing a participant in the shared embedding space. For each block we only use the spatial embedding for the participant in that block, shown here as the red dot. (b) This spatial embedding is submitted to a neural network. The same neural network is shared by all spatial embeddings. The use of neural networks allows a potentially non-linear mapping between the embedding space and the variations in the spatial factors.(c) The neural network maps this embedding to the  $K$  spatial factors to represent the functional units of activation in the brain, shown as the red circles. These spatial factors are assumed to be radial basis functions parameterized by the centers and widths output by the network. Here we show these spatial factors as red circles covering two widths of the radial basis function. The Spatial Factors is denoted by a matrix  $F$  of size  $K \times V$ . As such, the differences in the spatial embeddings reflects the variations in these spatial factors. **(d-g) Generating factor weights:**(d,e) Similar to the spatial embeddings we also sample a participant activation embedding for the same participant and trial activation embedding for the trials across task conditions corresponding to the combination. These embeddings are meant to capture overall participant and trial dependent activity respectively. (f) These two embeddings are then passed to a neural network to produce the corresponding  $p \times s$ - activation embedding. Each dot represents a unique participant and trial combination. (g) The activation embedding is then passed through another neural network to generate the Factor Weight matrix of  $W$  of size  $T \times K$ . The factor weights capture the activations of the spatial factors. The neural network outputs the mean and a standard deviation of activation for each factor. Each factor's activation is then generated by sampling independently over TRs from the corresponding Gaussian distribution to create the time varying weights  $W$ . As such, variations in locations of these activation embeddings reflects variations in the activations of spatial factors. The embeddings provide a way to visualize high dimensional variations between brain activations for different participant-stimulus combinations. (h) Finally, these weights and spatial factors can be arranged in the form of two matrices  $W \in \mathbb{R}^{T \times K}$  and  $F \in \mathbb{R}^{K \times V}$ . The matrix of spatial factors  $F$  and their activations  $W$  can be multiplied to generate data  $\mathbf{Y}$  i.e. this segment of fMRI data. For a comprehensive version of this figure, see Figure. 5 in Appendix.

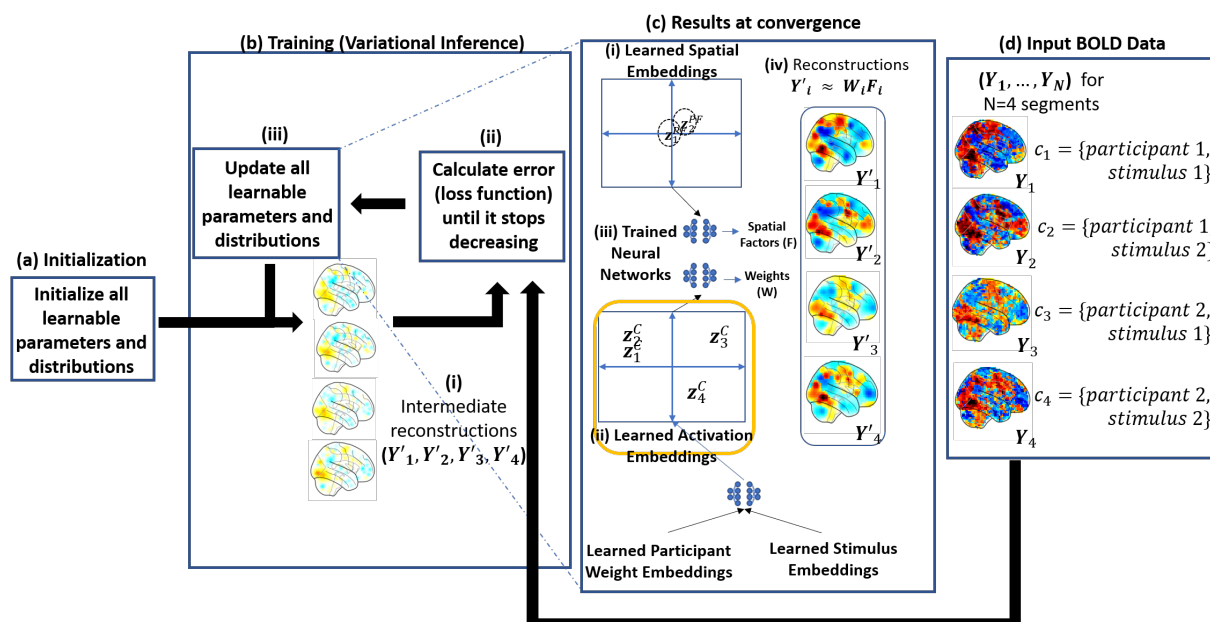

Figure 3: **NTFA Training using variational inference:** This figure shows the training procedure for NTFA for a hypothetical dataset that includes two participants and two stimuli for a total of four combinations. Mean brain images for the four segments can be seen in panel (d) where the preprocessed BOLD data is split into segments of participant-trial combinations, denoted here as  $c_1, c_2, c_3$  and  $c_4$  for this hypothetical example. **(a) Initialization** All parameters and distributions are initialized as specified in Appendix Section 5. **(b) Training (b-i)** All parameters and distributions are first initialized (see Appendix Section 5). **(b-ii)** The parameters are used iteratively to calculate the reconstructions error. The loss function is defined as the sum of reconstruction error and the regularizer (see Equation 10 in Appendix Section 5). This is a consequence of using variational inference which aims to approximate the unknown posterior distributions of all the hidden variables with a set of simpler distributions, Gaussian in this case. **(b-iii)** These parameters are then updated in the direction of decreasing loss using stochastic gradient descent (SGD). The iterations are repeated until convergence that is when the loss function stops decreasing. **(c) Results at convergence** The learned parameters at convergence are represented by the embeddings. The embeddings provide a visual conclusion of variances in neural activity across different participant-trial combination. **(c-i)** The learned spatial embeddings encode the relative differences in the locations and widths of the spatial factors between participants. **(c-ii)** The learned activation embeddings are highlighted here in yellow as they are the main focus of this paper. These embeddings represent the differences in activation of the spatial factors among different participant-trial combinations. For example, in this hypothetical case the combinations 1 and 2 on the left of the plot are more similar to each other as compared to combinations 3 and 4. **(c-iii)** The three trained neural networks allow us to capture potentially nonlinear relationships between different participants' spatial factors as well as activations for different combinations. These neural networks can also be used to generate unseen data including unseen participant-trial combinations by providing inputting appropriate embeddings. **(c-iv)** Shows the learned reconstructions that should approximate the major patterns in the input data as can be seen by side by side comparison with panel (d) with a limited number of spatial factors  $K \ll V$ . For a comprehensive version of this figure see Figure 6 in the Appendix.



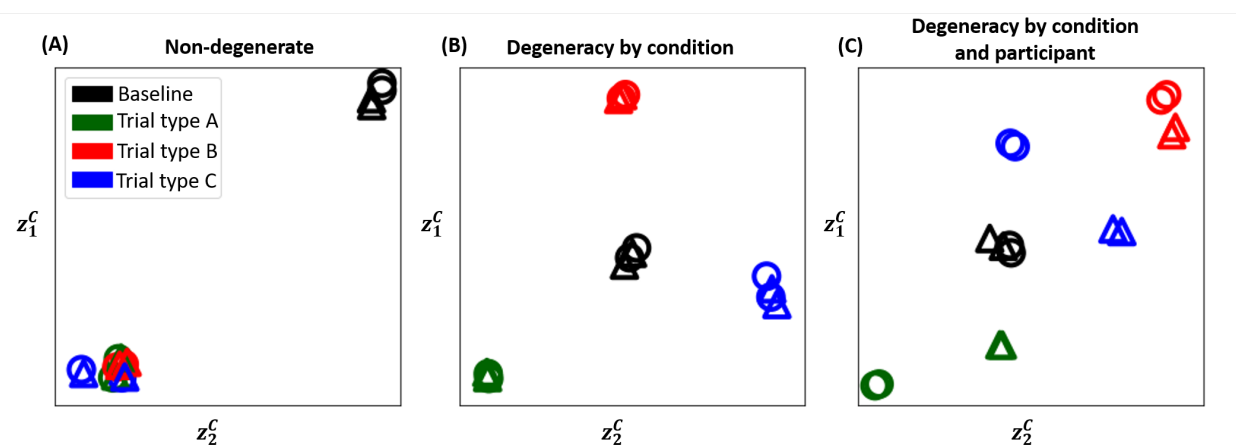

Figure 4: **Inferred activation embeddings:** The activation embeddings learned from NTFA for the three scenarios depicted in Figure 1 are shown here. NTFA was trained in an unsupervised manner and labels and colors are overlaid only for visualization and interpretation purposes. Each point represents a unique participant-trial combination. The colors correspond to trials as shown in the legend. Circles represent participant 1 and triangles represent participant 2. (a) **Non-degenerate:** The embeddings suggest there is no degeneracy, with combinations for all three experimental condition trials grouping together and away from the baseline combinations. (b) **Degeneracy by condition:** The embeddings suggest degeneracy in brain response based on trials, as the combination embeddings for each trial form a cluster of its own away from other clusters and away from baseline. There are no participant driven differences suggesting no degeneracy by participants. (c) **Degeneracy by condition and participants:** The embeddings here suggest degeneracy by both trials as well as participants, with the combinations forming groups of their own based on not just trials, but also splitting up by participants in case of Trial A and Trial C.
